# Supplementary material for: Contrasting Foraging Patterns: Testing Resource-Concentration and Dilution Effects with Pollinators and Seed Predators
Source: MDPI journal article supplement (doi:10.3390/insects7020023), 2016-06-03
Supplement: s1 [file s1]

# Supplementary Materials: Contrasting Foraging Patterns: Testing Resource-Concentration and Dilution Effects with Pollinators and Seed Predators

Alexandria Wenninger, Tania N. Kim, Brian J. Spiesman and Claudio Gratton

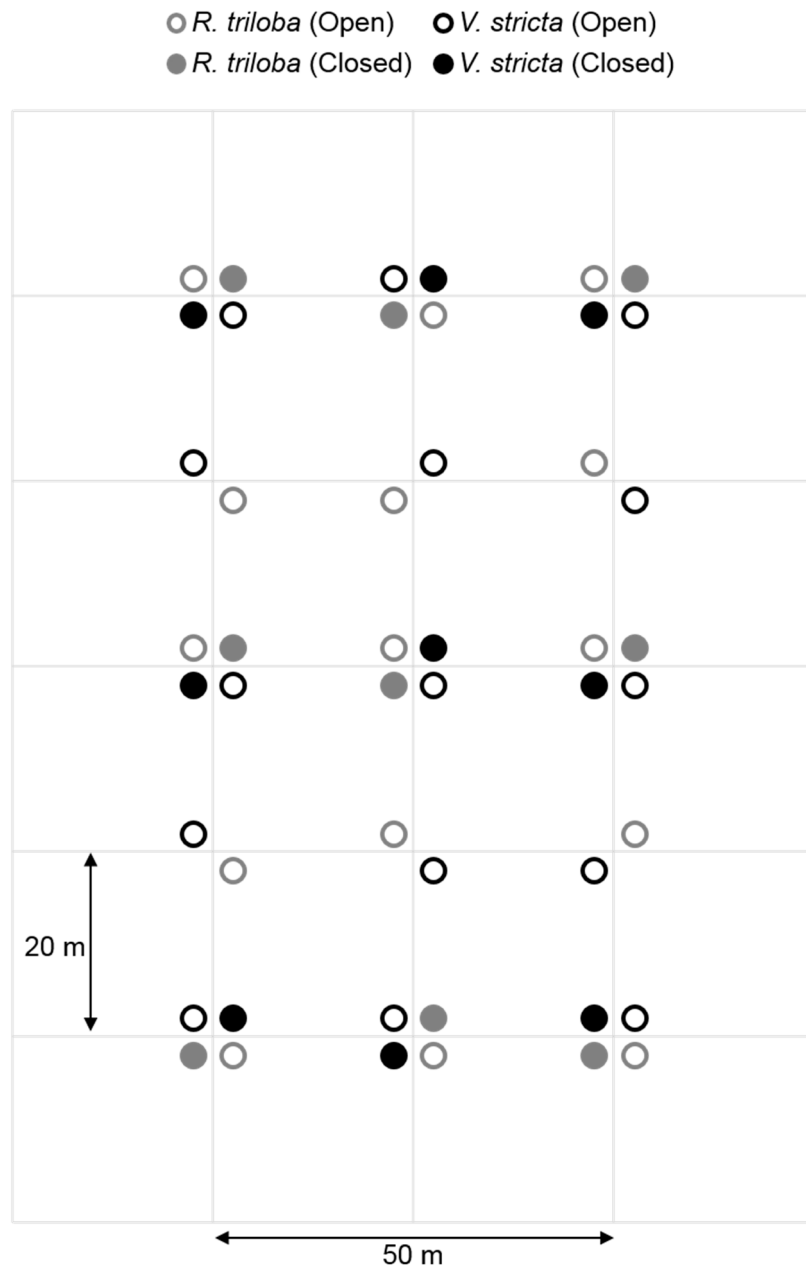

**Figure S1.** Experimental layout of plants within each site. Points represent a single potted plant (either *Rudbeckia triloba* or *Verbena stricta*). Plants at each station were separated by >1.5 m from each other; stations were separated by >20 m. “Open” are plants with unbagged flowers (exposed to pollination,  $n = 30$  individuals); “Closed” are plants with bagged flowers (preventing pollination,  $n = 18$  individuals). Total number of plants per site = 48 individuals.

**Table S1.** ANOVA tables for floral resource density and site, effects on total number of visits (square-root transformed), visits per flower, total visitation time (log-transformed), number of seeds produced (square-root transformed), total seeds removed (square-root transformed), proportion of seeds removed (log-transformed), and final number of seeds remaining at the end of the experiment (square-root transformed). Table S1A for *Verbena stricta* and Table S1B for *Rudbeckia triloba*.

| Predictor Variables         |                |                 |            |                 |                       |      |
|-----------------------------|----------------|-----------------|------------|-----------------|-----------------------|------|
| (A) <i>Verbena Stricta</i>  | Floral Density |                 | Site       |                 | Floral Density × Site |      |
| Response Variables          | $F_{2,24}$     | $p$             | $F_{1,24}$ | $p$             | $F_{2,24}$            | $p$  |
| Total visits                | 2.67           | 0.08            | 7.77       | <b>0.01</b>     | 0.05                  | 0.94 |
| Visits per flower           | 5.42           | <b>0.01</b>     | 8.02       | <b>&lt;0.01</b> | 1.08                  | 0.35 |
| Total visitation time       | 0.66           | 0.52            | 2.61       | 0.11            | 1.45                  | 0.25 |
| Seeds produced              | 18.00          | <b>&lt;0.01</b> | 13.65      | <b>&lt;0.01</b> | 0.36                  | 0.69 |
| Total seeds removed         | 5.69           | <b>&lt;0.01</b> | 1.03       | 0.31            | 0.27                  | 0.76 |
| Proportion of seeds removed | 0.05           | 0.94            | 5.78       | <b>0.02</b>     | 0.49                  | 0.61 |
| Final seeds number          | 10.29          | <b>&lt;0.01</b> | 14.85      | <b>&lt;0.01</b> | 0.47                  | 0.62 |

  

| Predictor Variables          |                |                 |            |             |                       |                 |
|------------------------------|----------------|-----------------|------------|-------------|-----------------------|-----------------|
| (B) <i>Rudbeckia Triloba</i> | Floral Density |                 | Site       |             | Floral Density × Site |                 |
| Response Variables           | $F_{2,24}$     | $p$             | $F_{1,24}$ | $p$         | $F_{2,24}$            | $p$             |
| Total visits                 | 3.64           | <b>0.04</b>     | <0.01      | 0.97        | 3.65                  | <b>0.04</b>     |
| Visits per flower            | 0.21           | 0.80            | 0.01       | 0.91        | 6.67                  | <b>&lt;0.01</b> |
| Total visitation time        | 0.16           | 0.84            | 4.84       | <b>0.03</b> | 0.06                  | 0.93            |
| Seeds produced               | 28.15          | <b>&lt;0.01</b> | 0.39       | 0.53        | 0.64                  | 0.53            |
| Total seeds removed          | 12.74          | <b>&lt;0.01</b> | <0.01      | 0.92        | 1.23                  | 0.31            |
| Proportion of seeds removed  | 4.66           | <b>0.01</b>     | 1.85       | 0.18        | 0.74                  | 0.48            |
| Final seeds number           | 5.25           | <b>0.01</b>     | 0.26       | 0.60        | 0.92                  | 0.40            |

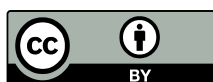

© 2016 by the authors; licensee MDPI, Basel, Switzerland. This article is an open access article distributed under the terms and conditions of the Creative Commons by Attribution (CC-BY) license (<http://creativecommons.org/licenses/by/4.0/>).
